# Quantifying the impact of ecological memory on the dynamics of interacting communities

Moein Khalighi<sup>1\*</sup>, Didier Gonze<sup>2</sup>, Karoline Faust<sup>3</sup>, Guilhem Sommeria-Klein<sup>1</sup>, Leo Lahti<sup>1\*</sup>

**1** Department of Computing, Faculty of Technology, University of Turku, Finland

**2** Unité de Chronobiologie Théorique, Faculté des Sciences CP 231, Université Libre de Bruxelles, Belgium

**3** Laboratory of Molecular Bacteriology (Rega Institute), Department of Microbiology, Immunology and Transplantation, KU Leuven, Leuven, Belgium

\* Corresponding authors

moein.khalighi@utu.fi (MKH)

leo.lahti@utu.fi (LL)

## Abstract

Ecological memory refers to the influence of past events on the response of an ecosystem to exogenous or endogenous changes. Memory has been widely recognized as a key contributor to the dynamics of ecosystems and other complex systems, yet quantitative community models often ignore memory and its implications.

Recent studies have shown how interactions between community members can lead to the emergence of resilience and multistability under environmental perturbations. We demonstrate how memory can complement such models. We use the framework of fractional calculus to study how the outcomes of a well-characterized interaction model are affected by gradual increases in ecological memory under varying initial conditions, perturbations, and stochasticity.

Our results highlight the implications of memory on several key aspects of community dynamics. In general, memory slows down the overall dynamics and recovery times after perturbation, thus reducing the system's resilience. However, it simultaneously mitigates hysteresis and enhances the system's capacity to resist state shifts. Memory promotes long transient dynamics, such as long-standing oscillations and delayed regime shifts, and contributes to the emergence and persistence of alternative stable states.

Collectively, these results highlight the fundamental role of memory on ecological communities and provide new quantitative tools to analyse its impact under varying conditions.

## Author summary

An ecosystem is said to exhibit *ecological memory* when its future states do not only depend on its current state but also on its initial state and trajectory. Memory may arise through various mechanisms as organisms learn from experience, modify their living environment, collect resources, and develop innovative strategies for competition and cooperation. Despite its commonness in nature, ecological memory and its potential influence on ecosystem dynamics have been so far overlooked in many applied contexts. Here, we combine theory and simulations to investigate how memory can influence community dynamics, stability, and composition. We incorporate in particular memory effects in a multi-species model recently introduced to investigate alternative stable states in microbial communities, and assess the impact of memory on key aspects of model behavior. The approach we propose for modeling memory has the potential to be more broadly applied in microbiome research, thus improving our understanding of microbial community dynamics and ultimately our ability to predict, manipulate and experimentally design microbial ecosystems.

## Introduction

The temporal variations observed in ecosystems arise from the interplay of complex deterministic and stochastic processes, the identification and characterization of which requires quantitative models. The empirical study of microbial communities provides an ideal source of data to inform the development of dynamical community models, since this active research area generates rich ecological time series under highly controlled experimental conditions and perturbations [1]. Nevertheless, despite the recent advances in metagenomic sequencing and other high-throughput profiling technologies that are now transforming the analysis of microbial communities [2], there has only been limited success in accurately modeling and predicting the complex dynamics in microbial communities. This highlights the need for re-evaluating and extending the available models to better account for the various mechanisms that underlie community dynamics [1,3–7]. One central shortcoming of the currently popular dynamical models is that they ignore the role of memory, that is, they are based on the assumption that the community’s future behavior solely depends on its current state, perturbations, and stochasticity.

Ecological memory is present when the community’s past states and trajectories influence its dynamics over extended periods. It is a fundamental aspect of natural communities, and its influence on community dynamics has been widely recognized across ecological systems [8–11]. Memory can emerge through a

number of mechanisms, including the accumulation of abiotic and biotic material characterizing past legacies of the system [12,13]. Thus, developing and investigating new means to incorporate memory in dynamical models of ecological communities has the potential to yield more accurate mechanistic understanding and predictions.

Diverse approaches have been proposed to explore ecological memory, including time delays [10,14,15], historical effects [16], exogenous memory [11], and buffering of disturbances [17]. A stochastic framework was used to evaluate the length, patterns, and strength of memory in ecological case studies [10]. However, the impact of memory has not been systematically addressed, and specific methods have been missing for incorporating memory into standard deterministic models of microbial community dynamics.

Potential community assembly mechanisms have been recently investigated based on extensions of the generalized Lotka-Volterra framework, which provides a standard model for species interactions [18–20]. The standard model has been extended by incorporating external perturbations [21], sequencing noise [22] and variance components [23], and to satisfy specific modeling constraints [24] such as compositionality [25]. Generalized Lotka-Volterra models have also been combined with Bayesian Networks for improved longitudinal predictions [26]. One goal of these modeling efforts is to understand how the alternative community types reported in the human microbiome may arise, possibly in combination with external factors [27–31]. Despite the recent popularity of generalized Lotka-Volterra models in microbial ecology, the impact of memory in these models has been largely ignored.

We address the above shortcomings by explicitly incorporating a class of memory effects into community interaction models using fractional calculus, which provides well-established tools for modeling memory [32,33]. We incorporate memory into a multi-species model that was recently used to illustrate the emergence of alternative states in microbial communities [18], and we then use this extended model to demonstrate how memory can influence critical aspects of community dynamics. This contributes to the growing body of quantitative techniques for studying community resistance, resilience, prolonged instability, transient dynamics, and abrupt regime shifts [34–38].

## Model

The generalized Lotka-Volterra and its extensions are ordinary differential equation (ODE) systems. This class of models has been commonly used to model community dynamics, but their standard formulations ignore memory effects. Here, we show how ecological memory can be included in these models based on *fractional calculus*. This mathematical tool provides a principled framework for incorporating memory effects into ODE systems (see *e.g.* [32,33,39,40]), thus allowing a systematic analysis and quantification of memory effects in commonly used dynamical models of ecological communities.

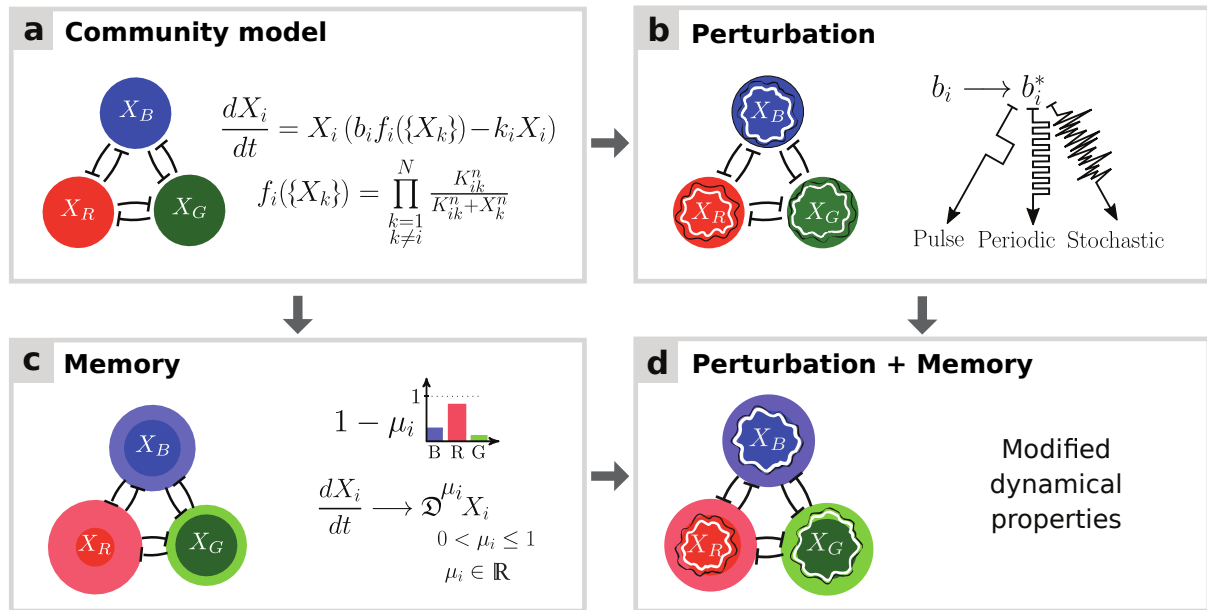

**Fig 1. Schematic illustration of a three-species community in the presence of memory and perturbations.** (a) The mutual interaction model describes the dynamics of species abundances  $X_i$ , which depends on the growth rates  $b_i$ , death rates  $k_i$ , and inhibition functions  $f_i$ , where  $K_{ij}$  and  $n$  denote interaction constants and Hill coefficients, respectively [18]. (b) Standard perturbations include pulse, periodic, and stochastic variation in species immigration, death, or growth rates. Such perturbations may trigger shifts between alternative states. (c) Memory (bolded circles) can be incorporated into dynamical models by substituting the integer-order derivatives with fractional derivatives  $\mathfrak{D}^{\mu_i}$  of order  $\mu_i$  (see [32] and Appendix S1). As decreasing  $\mu_i$  values correspond to increasing memory, memory is measured as  $1 - \mu_i$ . When all community members have the same memory ( $\mu_i = \mu$  for all  $i$ ), the system is said to have *commensurate* memory, otherwise *incommensurate*. Increasing memory changes community dynamics, in particular by slowing it down and modifying the stability landscape around stable states. (d) Ecological memory can change the system's dynamics under perturbation.

Let us first consider a simple community with three species that tend to inhibit each other's growth (Fig 1a). We will later extend this model community to a larger number of species. To model this system, we employ a non-linear extension of the generalized Lotka-Volterra model that was recently used to demonstrate possible mechanisms underlying the emergence of alternative states in a multi-species community [18]. This non-linear model describes the dynamics of a species  $i$  as a function of its growth rate, death rate, and an interaction term determined by the interaction matrix between all species pairs, as described in Fig 1a. Under certain conditions, this model gives rise to a tristable community, where each stable state corresponds to the dominance of a different species. The community can shift from one stable state to another following an external or internal perturbation (Fig 1b).

To introduce memory, we extend this model by incorporating fractional derivatives. In this extended formulation, the classical derivative operator  $d/dt$  is replaced by the fractional derivative operator  $\mathfrak{D}^{\mu_i}$ , where  $\mu_i \in ]0, 1]$  is the non-integer derivative order for species  $i$  (Fig 1c). The fractional derivative is defined by a convolution integral with a power-law memory kernel (see Appendix S1). The  $\mu_i$  can then be used as a tuning parameter for memory, with lower values of  $\mu_i$  indicating higher levels of memory for

species  $i$  [32]. The *strength of memory* for species  $i$  is measured as  $1 - \mu_i$ . The three special cases of this model include (i) *no memory* ( $\mu_i = \mu = 1$  for all species  $i$ ), which corresponds to the original community model in [18]; (ii) *commensurate memory*, where all species have equal memory ( $\mu_i = \mu \leq 1$ ); and (iii) *incommensurate memory*, where  $\mu_i$  may be unique for each  $i$ , and hence the degree of memory may differ between species. We numerically solve the fractional-order model with varying values of the parameter  $\mu_i$ , thus inducing varying levels of memory, and use it to analyse the effect of memory on various aspects of community dynamics, in particular its response to perturbations (Fig 1d).

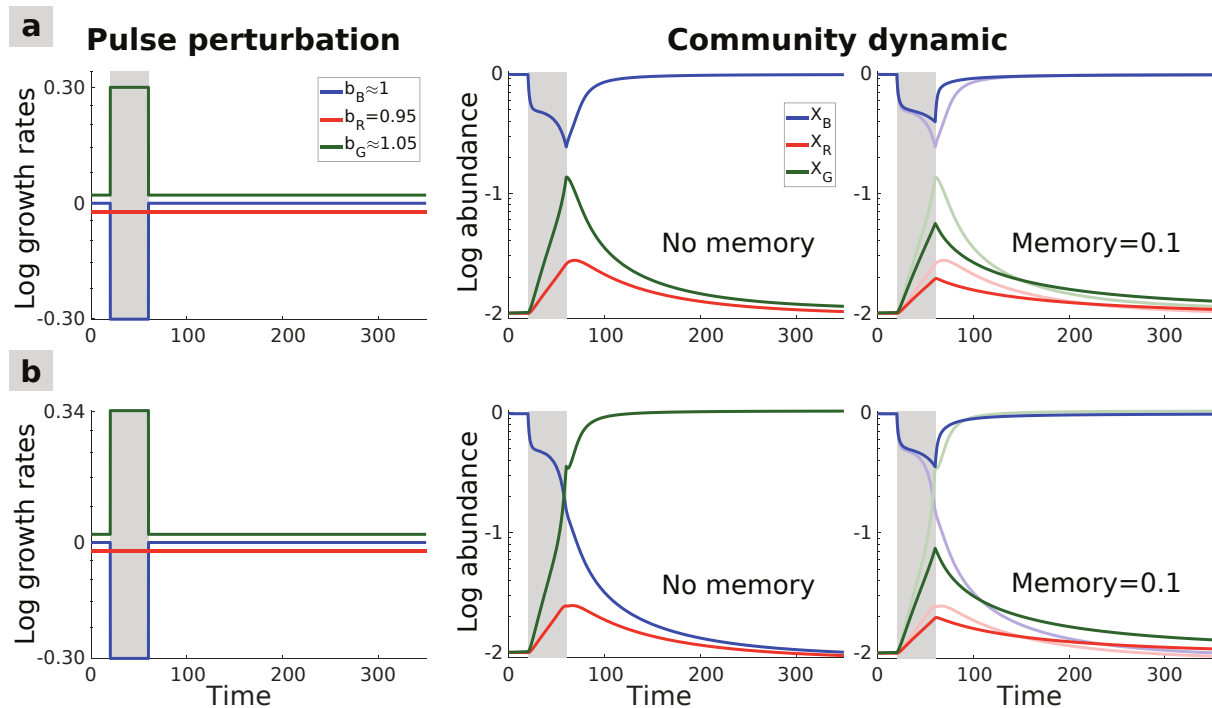

**Fig 2. Impact of commensurate memory on community resistance and resilience.** (a) A pulse perturbation is applied to the community (left panel): the growth rate of the blue species is lowered while that of the green species is simultaneously raised. The perturbation temporarily moves the community away from its initial stable state, characterized by blue species dominance (middle panel). Introducing commensurate memory (right panel) increases resistance to perturbation since the community is not displaced as far from its initial state compared to the memoryless case (shown in superimposition). The effect on resilience depends on the time scale considered: while memory initially hastens the recovery after the perturbation, it slows down the later stages of the recovery (starting around the time step 150). (b) A slightly stronger pulse perturbation is applied (left panel), triggering a shift toward an alternative stable state dominated by the green species (middle panel). Memory can prevent the state shift (right panel). Thus, here, not only does memory increase community resistance to perturbation, but also resilience as manifested by the prevented state shift.

## Results

We have shown above how ecological memory can be incorporated in dynamical community models based on the framework of fractional calculus. Next, we use numerical simulations and analyses of this model to highlight the impact of memory on key dynamical properties of multi-species communities.

In general, memory adds a certain inertia in community dynamics as the influence of past states gradually fades out. Commensurate memory thus slows down the overall dynamics, which may lead to qualitative changes in the dynamics as well as community composition under certain conditions. In particular, memory-induced inertia tends to damp down fluctuations and can therefore mitigate or prevent more extreme and sudden changes in the system. Overall, our results show that ecological memory affects the community dynamics in two important ways: by enforcing more moderate levels of fluctuations, and by inducing quantitative and qualitative changes in how the system responds to perturbations or varying initial conditions. In the first section below, we report the consequences of these changes on community resistance and resilience.

The emergence of alternative community states has been debated in the microbiome research literature. For instance, [18] demonstrated how pulse perturbations can bring the 3-species system to a boundary of the tristability region, which then triggers a transition to an alternative stable state. In that model, such a transition can be for instance controlled by changes in the species' growth rates. In the second section below, we report how memory can exert additional influence on the resulting dynamics and alter the community's stability landscape.

## Resistance and resilience

*Resistance* refers to a system's capacity to withstand a perturbation without changing its state, while *resilience* refers to its capacity to recover to its original state after a perturbation [41]. To examine the impact of ecological memory on community resistance and resilience in response to perturbations, we perturbed the system by changing the species growth rates over time. Specifically, we investigated the three-species community under *pulse* (Figs 2), *periodic* (Fig 3), and *stochastic* (Figs 4) perturbations, and analysed the impact of these three types of perturbations on community dynamics in the presence of memory, which is commensurate in this subsection.

Our results show that memory tends to increase resistance to perturbations by allowing the competing species' coexistence for a longer time. In the presence of memory, switches between alternative community states take place more slowly following a pulse perturbation (Fig 2a), or in some cases may be prevented entirely (Fig 2b). Fig S1 provides a further example of the increased resistance provided by memory in a larger, unstructured community, where memory helps preserve the stable state after a pulse perturbation compared to the corresponding memoryless system.

After the perturbation has ceased, memory initially hastens the return to the original state, but then slows it down in the later stages of the recovery (Fig 2a). Thus, the impact of memory on resilience is multi-faceted: depending on the time scale considered, memory may either slow down or hasten the recovery from perturbations, thus reducing or increasing resilience. Furthermore, in multistable systems,

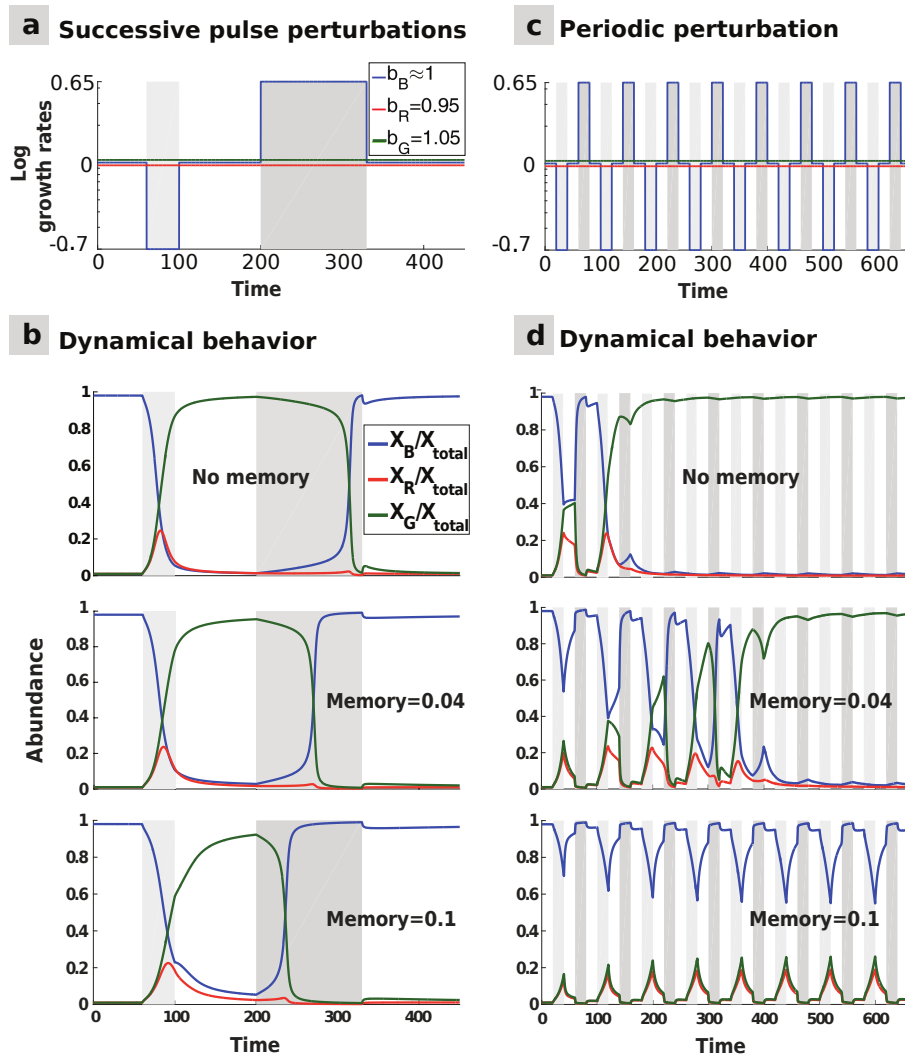

**Fig 3. Multi-pulse and periodic perturbations: memory impact on hysteresis and transient oscillations.** (a) Two opposite pulse perturbations are applied successively: the blue species growth rate is first briefly lowered, and then raised for a longer time. (b) The top panel shows the hysteresis in the system: the state shift towards the dominance of the green species occurs faster after the first perturbation than the shift back to the initial stable state after the second perturbation. Introducing commensurate memory (middle and bottom panels) delays the first state shift, thus increasing resistance, and hastens the second state shift, thus mitigating the hysteresis effect and increasing long-term resilience. (c) Rapidly alternating opposite perturbations are applied to the blue species growth rate with a regular frequency. (d) Without memory (top), the hysteresis effect leads to a permanent shift towards the green-dominated alternative stable state after a few oscillations. Adding commensurate memory mitigates the hysteresis, thus extending the transitory period (middle), which may generate longstanding oscillations in community composition before the community converges to a stable state (bottom).



memory may enhance resilience by promoting the persistence of the original stable state (Fig 2b). 107

Considering two successive pulse perturbations in opposite directions highlights another way memory 108  
can affect resilience in multistable systems (Fig 3a). After a state shift triggered by a first perturbation, 109  
memory may hasten recovery to the initial state following a second, opposite perturbation, hence increasing 110  
long-term resilience. Memory can thus mitigate the hysteresis that is typical of many ecological systems. 111

In the presence of regularly alternating opposite pulse perturbations, akin to those experienced by 112  
marine plankton or the gut microbiome, the community may not be able to recover its initial state if the 113  
perturbations follow each other too rapidly. In such circumstances, memoryless communities reach a new 114  
stable state faster than the communities with memory, as the latter resist the perturbations for a longer 115  
time due to the reduced hysteresis (Fig 3b). This may lead to community dynamics being trapped in 116  
long-lasting transient oscillations. 117

Finally, we analyse the role of stochastic perturbations, which are an essential component of variation 118  
in real systems. Under stochastic perturbation (Fig 4a), ecological memory can dampen the fluctuations 119  
and significantly delay the shift towards an alternative stable state (Fig 4b). This demonstrates in a more 120  
realistic perturbation setting how memory can promote community resistance. 121

Memory can nevertheless have unexpected effects on community dynamics when its strength is tuned 122  
to bring the system in the vicinity of the tristable region, where the outcome of the dynamics is highly 123  
sensitive to initial conditions (Fig 4c). Under such conditions, minute changes in memory can push the 124  
system over a tipping point towards another attractor, radically changing the outcome. This illustrates 125  
that, beyond slowing down the dynamics and damping perturbations, memory can have non-trivial effects 126  
on the system's stability landscape, which we investigate in the next section. 127

## Impact on stability landscape 128

Let us now consider a more complex community of 15 species structured into three groups through their 129  
interaction matrix. Each of these groups represents a set of weakly competing species—*e.g.*, due to 130  
cross-feeding interactions that mitigate competition, while species belonging to different groups compete 131  
more strongly with each other (Fig 5a). We show that adding incommensurate memory in such a system 132  
can change the final stable state of the community even in the absence of perturbation. In particular, 133  
increasing the strength of memory in the group that is dominant in the stable state of the memoryless 134  
system can lead to its exclusion from the new stable state (Fig 5b-c). Around the threshold value, long 135  
transients can be observed (Fig 5d): even without changing any of the model parameters or imposing 136  
noise, an abrupt regime shift is triggered by the accumulated effect of memory after a long period of 137  
subtle, gradual changes. 138

Remarkably, adding memory in a given species may lead to either a reduction or an increase in its 139



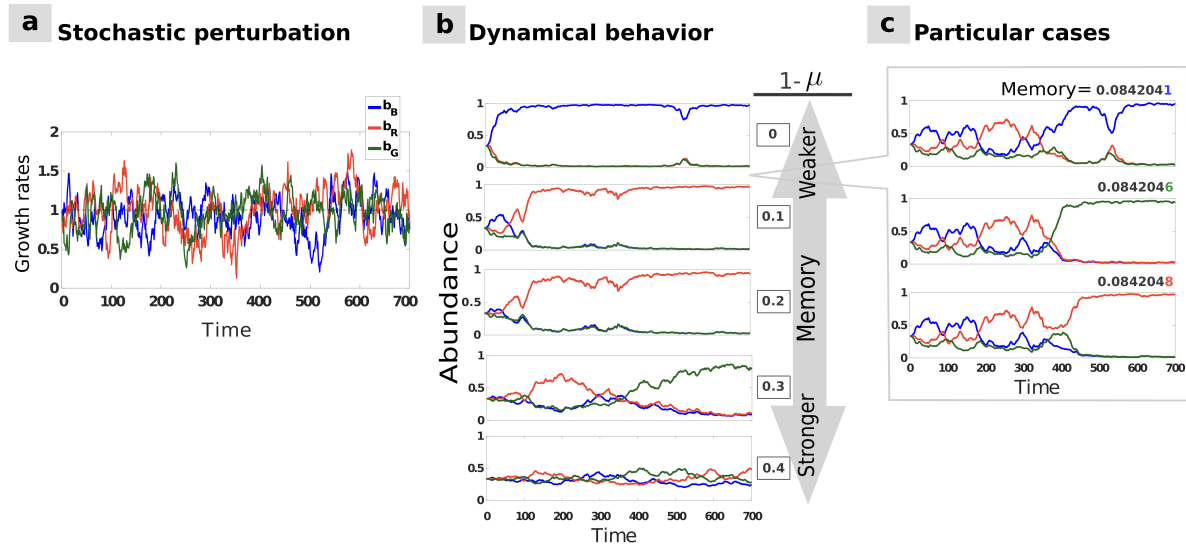

**Fig 4. Stochastic perturbations with commensurate memory effects.** (a) Stochastic perturbation in a three-species system: species growth rates  $b_i$  vary stochastically through time according to an Ornstein-Uhlenbeck process (see Appendix S2). (b) Dynamical behavior of the system in response to the stochastic perturbation for equal initial species abundances and varying memory level: in addition to slowing down community dynamics, increasing memory limits the overall variation in species abundances, thus enhancing the overall resistance of the system. (c) For some memory strengths, the final state of the system can be sensitive to slight variations in memory, with drastic consequences on community composition.

abundance depending on the conditions. While Fig 5b-c illustrates the exclusion of a group of species 140  
with higher memory from the stable state in the absence of perturbation, memory may conversely increase 141  
the persistence or abundance of a species in the presence of stochastic perturbation (Fig S2b). In fact, in 142  
the presence of perturbation, the dominance of any of the species may be achieved by tuning memory in a 143  
single species. This result holds both in the case of pulse (Fig S2a) and stochastic (Fig S2b) perturbation. 144

Bifurcation diagrams further show that, in addition to modifying the boundary between stable states 145  
in the space of initial conditions, memory can also broaden the region of the model's parameter space 146  
that exhibits multistability (Fig S3). We illustrate for instance in Figure 6 that incommensurate memory 147  
can induce multistability in a 3-species community that would otherwise converge to a single stable 148  
state in the absence of memory. Ecological memory thus provides an alternative and largely overlooked 149  
mechanism for the emergence of multistability. 150

Finally, we show that simply setting similar levels of ecological memory within groups of species in an 151  
otherwise unstructured community may lead to the formation of coherent species assemblages with shared 152  
dynamics (Fig S4). This provides an additional mechanism for the emergence of distinct community 153  
types, each associated with the dominance of one such assemblage. Hence, our results show that memory 154  
can by itself lead to the emergence of alternative community types, between which the community may 155  
switch following a change in either initial conditions (Fig 6) or memory strength (Fig S4). 156

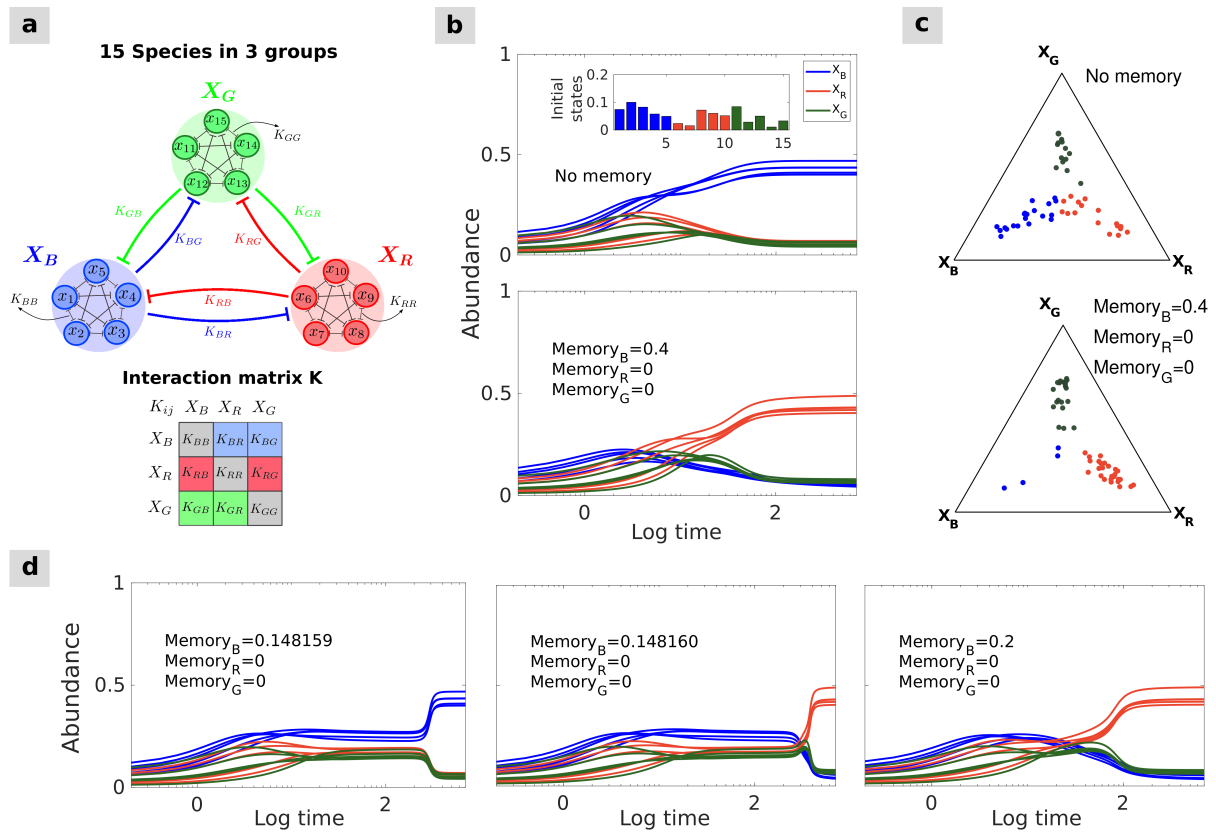

**Fig 5. Impact of incommensurate memory on the community stability landscape: regime shifts without perturbation.** (a) A simulated mutual interaction model with 15 species in three groups, blue, red, and green (see [18]). The interactions between species from different groups and within each group are illustrated. The within-group interactions are stronger than between-group interactions. (b) Starting from random initial conditions, the blue group of species dominates the community at the stable state when no memory is present (top). Imposing memory on the blue species leads to a temporary rise in abundance, but ultimately another (red) group of species dominates instead (bottom). (c) The stable state distributions of 50 simulations are represented by ternary plots. Each dot shows, for one simulation, the identity of the dominant group (color) and the average relative abundances of the three groups (position in the triangle) at convergence time (see Appendix S2 for details). In the memoryless system (top), the three groups roughly have the same chance of dominating the stable state, whereas imposing memory effects on the blue set of species (bottom) favors stable states where those species are not dominant. (d) Exceeding a particular threshold on incommensurate memory on the blue species (here, 0.14816) leads to an abrupt regime shift after a long period of subtle, gradual inclines, without changing any model parameters or adding noise.

## Discussion

157

Our understanding of ecological community dynamics heavily relies on mathematical modeling. Dynamical 158  
community modeling is a particularly active research area in microbial ecology, where recent studies have 159  
proposed numerous mechanistic models of microbial community dynamics exploring the role of interactions, 160  
stochasticity, and external factors [1, 18, 42–44]. These studies have, however, largely neglected the role of 161  
ecological memory despite its potentially remarkable impact on community variation. 162

We have shown how ecological memory can be incorporated into models of microbial community 163

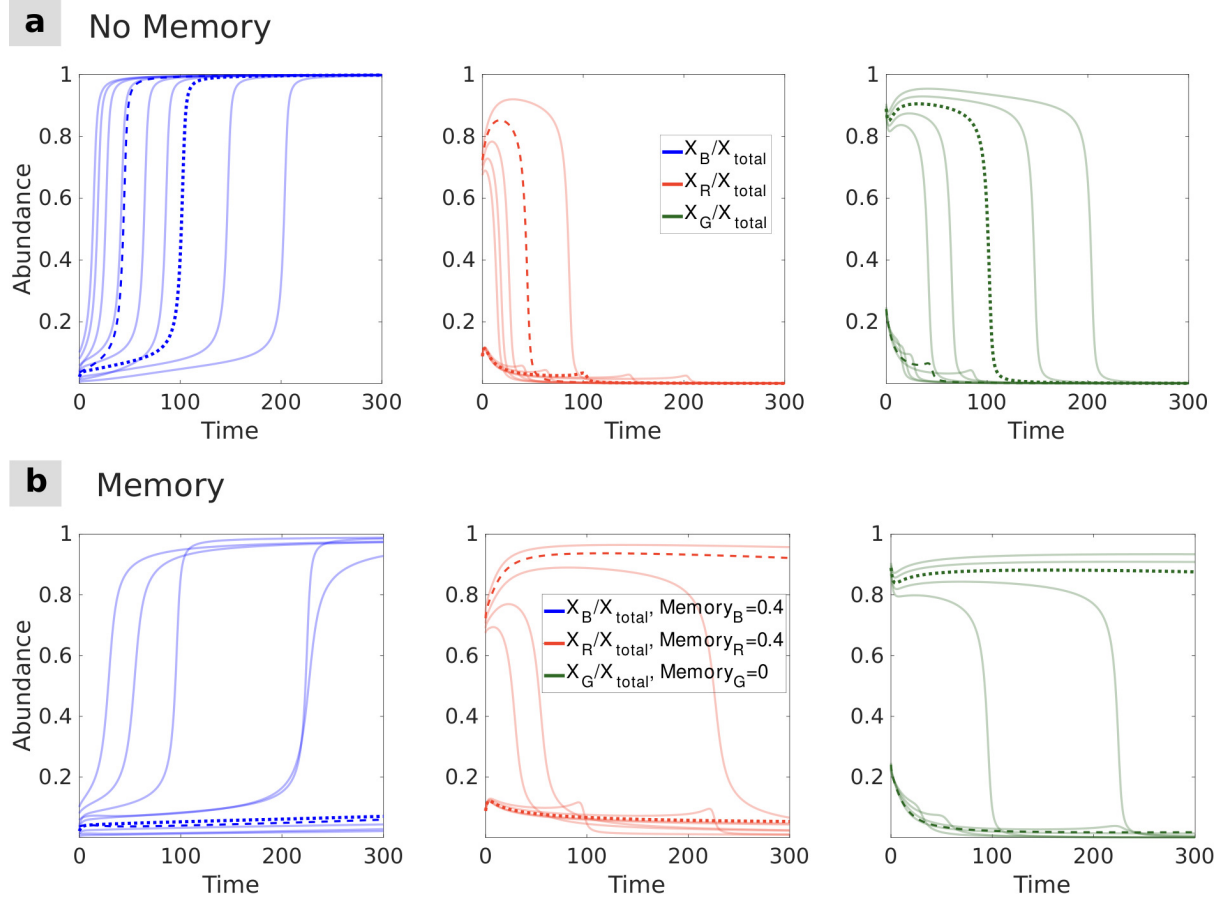

**Fig 6. Incommensurate memory can induce multistability.** Three-species community model that converges: (a) in the absence of memory, to a single stable state irrespective of initial abundances (see Fig S3), and (b) in the presence of incommensurate memory, to different stable states depending on species initial abundances. In each row, the three panels show the relative abundances of the blue, red and green species along time for the same set of initial conditions. In (b), the dashed and dotted lines indicate the initial abundance thresholds that separate the three alternative attractor states, each corresponding to the dominance of a different system species. No change in stable state is observed for the same values in the corresponding memoryless system (a).

dynamics, and used this modeling tool to demonstrate the role of memory as a potential key determinant 164  
of community dynamics. This has allowed us to expand our understanding of the impact of memory on 165  
community response to perturbation, long transient dynamics, delayed regime shifts, and the emergence 166  
of alternative community states. 167

Ecological communities are constantly subject to perturbations arising from external factors, as well 168  
as from internal processes and interactions between community members. Environmental fluctuations 169  
through time have a fundamental influence on ecological communities: they may promote species 170  
coexistence, increase community diversity [45,46], contribute to the properties of stable states [37,47], and 171  
in some cases, facilitate abrupt regime shifts [47]. Our analysis of memory in perturbed communities is 172  
closely linked to recent studies analysing the response of experimental microbial communities to antibiotic 173  
pulse perturbation [48,49], or the impact of periodic perturbations on the evolution of antimicrobial 174

resistance [34]. 175

Our approach is based on fractional calculus [32], a well-known mathematical framework with a 176  
broad range of applications [50, 51]. In this framework, ecological memory is represented by fractional 177  
derivatives and their associated kernel, which determines how quickly the influence of past states fades out 178  
(see Appendix S1). Commensurate fractional derivatives have previously been shown to cause intrinsic 179  
damping in a system [52–54], which may delay transitions or shift critical thresholds [33]. Incommensurate 180  
models, on the other hand, yield complicated ODE systems that are mathematically more challenging 181  
to analyse and therefore remain less well understood. We have shown here that the type of memory 182  
introduced by fractional derivatives can influence resistance and resilience in ecological communities. 183  
Quantifying this influence using recently proposed resilience measures, such as exit time [55], would 184  
provide a promising line of research for future work. While this framework allows introducing only a 185  
specific type of memory, our qualitative results on the influence of memory on community dynamics are 186  
likely to hold more generally. 187

In addition to damping, memory can also induce other dynamical properties, such as long periods of 188  
instability [36], or long transients [38], which have been reported in ecological systems [56] and chemostat 189  
experiments [57]. Long transients have previously been shown to be favored by stochasticity, multiple 190  
time scales, and high dimensionality [38], and our results indicate that memory should be added to this 191  
list; [38] also argue that regime shifts may occur during such long transient dynamics, without requiring 192  
parameter changes. Our results support this view, since we have shown that changes in incommensurate 193  
memory can trigger abrupt regime shifts even in the absence of perturbations. 194

Modeling real systems using models that incorporate memory would benefit from the ability to gather 195  
empirical evidence for the presence, strength, and quality of memory in the system. Recent literature 196  
suggests that it might indeed be possible to empirically detect the presence of memory based on the broad 197  
properties of a time series. It has been shown that longitudinal time series of microbial communities may 198  
carry detectable signatures of underlying ecological processes [4, 58]; and recently, Bayesian hierarchical 199  
models [10, 14], Random Forests [11], neural networks [59], and unsupervised Hebbian learning [60] have 200  
been proposed to detect signatures of memory in other contexts. 201

Several extensions of our model could be considered in future studies to enhance its flexibility and 202  
model memory more generally, such as varying initial times [33] or applying fractional differential equations 203  
with time-varying derivative orders [61]. Alternative approaches have also been considered to model 204  
ecological memory. These include the incorporation of autocorrelation or fixed time-lags into the model 205  
structure [15]. One could also model ecological memory by distributed delay differential equations 206  
(DDE) [62], fractional delay differential equations [63], or an integer memory-dependent derivative [64] 207  
with arbitrary kernel functions to shape different patterns of memory weights. 208

Ecological memory is a systemic property that can arise through various mechanisms. For instance, 209  
communities can alter their environment and thus modify environmental parameters in ways that reflect 210  
past events, or organisms may exhibit context-specific growth patterns that reflect adaptations [60, 65, 66]. 211  
Delay effects could also arise without memory and through other mechanisms, such as intracellular inertia. 212  
Species may indeed have different and often variable lag phases, due to complex intracellular processes 213  
that may be effectively memoryless. In such cases, the dampening effects could be simply modeled by 214  
introducing a “*break*” that would slow down or create a lag in community dynamics without inducing 215  
actual memory effects. Specifically designed longitudinal experiments could help evaluate the types and 216  
relative strengths of memory in real communities, such as in synthetic microbial communities that 217  
can be used to collect long and dense time series with highly controlled perturbations and replicated 218  
experiments. 219

Improving our understanding of the key mechanisms underlying community dynamics is a necessity 220  
to generate more accurate predictions, and ultimately to develop new techniques for the manipulation of 221  
complex ecological communities. We have combined theoretical analysis with computational simulations 222  
to explore the various facets of the influence of ecological memory and highlighted its often overlooked 223  
role as a key determinant of complex community dynamics. 224

## References 225

1. Gonze D, Coyte KZ, Lahti L, Faust K. Microbial communities as dynamical systems. *Curr Opin Microbiol.* 2018;44:41–49. doi:10.1016/j.mib.2018.07.004. 226  
227
2. Quince C, Walker AW, Simpson JT, Loman NJ, Segata N. Shotgun metagenomics, from sampling 228  
to analysis. *Nat biotechnol.* 2017;35(9):833–844. doi:10.1038/nbt.3935. 229
3. Song HS, Cannon WR, Beliaev AS, Konopka A. Mathematical Modeling of Microbial Community 230  
Dynamics: A Methodological Review. *Processes.* 2014;2(4):711–752. doi:10.3390/pr2040711. 231
4. Faust K, Bauchinger F, Laroche B, De Buyl S, Lahti L, Washburne AD, et al. Signatures 232  
of ecological processes in microbial community time series. *Microbiome.* 2018;6(1):1–13. 233  
doi:10.1186/s40168-018-0496-2. 234
5. Coenen AR, Hu SK, Luo E, Muratore D, Weitz JS. A Primer for Microbiome Time-Series Analysis. 235  
*Front genet.* 2020;11:310–310. doi:10.3389/fgene.2020.00310. 236
6. Björk JR, Dasari M, Grieneisen L, Archie EA. Primate microbiomes over time: Longitudinal 237  
answers to standing questions in microbiome research. *American Journal of Primatology.* 238  
2019;81(10-11):e22970. doi:10.1002/ajp.22970. 239

7. Fukuyama J, Rumker L, Sankaran K, Jeganathan P, Dethlefsen L, Relman DA, et al. Multidomain analyses of a longitudinal human microbiome intestinal cleanout perturbation experiment. *PLoS Comput Biol.* 2017;13(8):1–29. doi:10.1371/journal.pcbi.1005706. 240–242
8. Gunderson LH. Ecological Resilience—in Theory and Application. *Annu Rev Ecol Evol Syst.* 2000;31(1):425–439. doi:10.1146/annurev.ecolsys.31.1.425. 243–244
9. Johnstone JF, Allen CD, Franklin JF, Frelich LE, Harvey BJ, Higuera PE, et al. Changing disturbance regimes, ecological memory, and forest resilience. *Front Ecol Environ.* 2016;14(7):369–378. doi:10.1002/fee.1311. 245–247
10. Ogle K, Barber JJ, Barron-Gafford GA, Bentley LP, Young JM, Huxman TE, et al. Quantifying ecological memory in plant and ecosystem processes. *Ecol Lett.* 2015;18(3):221–235. doi:10.1111/ele.12399. 248–250
11. Benito BM, Gil-Romera G, Birks HJB. Ecological memory at millennial time-scales: the importance of data constraints, species longevity and niche features. *Ecography.* 2020;43(1):1–10. doi:10.1111/ecog.04772. 251–253
12. Schweiger AH, Boulangeat I, Conradi T, Davis M, Svenning JC. The importance of ecological memory for trophic rewilding as an ecosystem restoration approach. *Biol Rev.* 2019;94(1):1–15. doi:10.1111/brv.12432. 254–256
13. Žliobaitė I, Fortelius M, Stenseth NC. Reconciling taxon senescence with the Red Queen’s hypothesis. *Nature.* 2017;552(7683):92–95. doi:10.1038/nature24656. 257–258
14. Itter MS, Vanhatalo J, Finley AO. EcoMem: An R package for quantifying ecological memory. *Environ Model Softw.* 2019;119:305–308. doi:10.1016/j.envsoft.2019.06.004. 259–260
15. Golinski M, Bauch C, Anand M. The effects of endogenous ecological memory on population stability and resilience in a variable environment. *Ecol Model.* 2008;212(3):334–341. doi:10.1016/j.ecolmodel.2007.11.005. 261–263
16. Schaefer V. Alien invasions, ecological restoration in cities and the loss of ecological memory. *Restor Ecol.* 2009;17(2):171–176. doi:10.1111/j.1526-100X.2008.00513.x. 264–265
17. Bengtsson J, Angelstam P, Elmqvist T, Emanuelsson U, Folke C, Ihse M, et al. Reserves, resilience and dynamic landscapes. *Ambio.* 2003;32(6):389–396. doi:10.1579/0044-7447-32.6.389. 266–267
18. Gonze D, Lahti L, Raes J, Faust K. Multi-stability and the origin of microbial community types. *ISME J.* 2017;11(10):2159. doi:10.1038/ismej.2017.60. 268–269

19. Gibson T, Gerber G. Robust and Scalable Models of Microbiome Dynamics. In: Proceedings of the 35th International Conference on Machine Learning. vol. 80. PMLR; 2018. p. 1763–1772. 270
20. Marino S, Baxter NT, Huffnagle GB, Petrosino JF, Schloss PD. Mathematical modeling of primary succession of murine intestinal microbiota. *Proc Natl Acad Sci USA*. 2014;111(1):439–444. 272
21. Stein RR, Bucci V, Toussaint NC, Buffie CG, Räscht G, Pamer EG, et al. Ecological modeling from time-series inference: insight into dynamics and stability of intestinal microbiota. *PLoS Comput Biol*. 2013;9(12):e1003388. doi:10.1371/journal.pcbi.1003388. 274
22. Bucci V, Tzen B, Li N, Simmons M, Tanoue T, Bogart E, et al. MDSINE: Microbial Dynamical Systems Inference Engine for microbiome time-series analyses. *Genome Biol*. 2016;17(1):1–17. doi:10.1186/s13059-016-0980-6. 277
23. Shenhav L, Furman O, Briscoe L, Thompson M, Silverman JD, Mizrahi I, et al. Modeling the temporal dynamics of the gut microbial community in adults and infants. *PLoS Comput Biol*. 2019;15(6):e1006960. doi:10.1371/journal.pcbi.1006960. 280
24. Li C, Chng KR, Kwah JS, Av-Shalom TV, Tucker-Kellogg L, Nagarajan N. An expectation-maximization algorithm enables accurate ecological modeling using longitudinal microbiome sequencing data. *Microbiome*. 2019;7(1):1–14. doi:10.1186/s40168-019-0729-z. 283
25. Joseph TA, Shenhav L, Xavier JB, Halperin E, Pe'er I. Compositional Lotka-Volterra describes microbial dynamics in the simplex. *PLoS Comput Biol*. 2020;16(5):e1007917. doi:10.1371/journal.pcbi.1007917. 286
26. McGeachie MJ, Sordillo JE, Gibson T, Weinstock GM, Liu YY, Gold DR, et al. Longitudinal prediction of the infant gut microbiome with dynamic bayesian networks. *Sci Rep*. 2016;6:20359. doi:10.1038/srep20359. 289
27. Ravel J, Gajer P, Abdo Z, Schneider GM, Koenig SSK, McCulle SL, et al. Vaginal microbiome of reproductive-age women. *Proc Natl Acad Sci USA*. 2011;108(Supplement 1):4680–4687. doi:10.1073/pnas.1002611107. 292
28. Falony G, Joossens M, Vieira-Silva S, Wang J, Darzi Y, Faust K, et al. Population-level analysis of gut microbiome variation. *Science*. 2016;352(6285):560–564. doi:10.1126/science.aad3503. 295
29. Arumugam M, Raes J, Pelletier E, Le Paslier D, Yamada T, Mende DR, et al. Enterotypes of the human gut microbiome. *Nature*. 2011;473(7346):174–180. doi:10.1038/nature09944. 297
30. Ding T, Schloss PD. Dynamics and associations of microbial community types across the human body. *Nature*. 2014;509(7500):357–360. doi:10.1038/nature13178. 299



31. Costea PI, Hildebrand F, Arumugam M, Bäckhed F, Blaser MJ, Bushman FD, et al. Enterotypes 301  
in the landscape of gut microbial community composition. *Nat Microbiol.* 2018;3(1):8–16. 302  
doi:10.1038/s41564-017-0072-8. 303
32. Du M, Wang Z, Hu H. Measuring memory with the order of fractional derivative. *Sci Rep.* 304  
2013;3(1):1–3. doi:10.1038/srep03431. 305
33. Saeedian M, Khalighi M, Azimi-Tafreshi N, Jafari GR, Ausloos M. Memory effects on epidemic 306  
evolution: The susceptible-infected-recovered epidemic model. *Phys Rev E.* 2017;95:022409. 307  
doi:10.1103/PhysRevE.95.022409. 308
34. Marrec L, Bitbol AF. Resist or perish: Fate of a microbial population subjected to a periodic presence 309  
of antimicrobial. *PLoS Comput Biol.* 2020;16(4):e1007798. doi:10.1371/journal.pcbi.1007798. 310
35. Rivero M, Rogosin SV, Tenreiro Machado JA, Trujillo JJ. Stability of fractional order systems. 311  
*Math Probl Eng.* 2013;2013:356215. doi:10.1155/2013/356215. 312
36. Spanbauer TL, Allen CR, Angeler DG, Eason T, Fritz SC, Garmestani AS, et al. Prolonged 313  
instability prior to a regime shift. *PLoS One.* 2014;9(10). doi:10.1371/journal.pone.0108936. 314
37. Tropini C, Moss EL, Merrill BD, Ng KM, Higginbottom SK, Casavant EP, et al. Transient osmotic 315  
perturbation causes long-term alteration to the gut microbiota. *Cell.* 2018;173(7):1742–1754. 316  
doi:10.1016/j.cell.2018.05.008. 317
38. Hastings A, Abbott KC, Cuddington K, Francis T, Gellner G, Lai YC, et al. Transient phenomena 318  
in ecology. *Science.* 2018;361(6406):eaat6412. doi:10.1126/science.aat6412. 319
39. Amirian MM, Towers IN, Jovanoski Z, Irwin AJ. Memory and mutualism in species 320  
sustainability: A time-fractional Lotka-Volterra model with harvesting. *Heliyon.* 2020;6(9):e04816. 321  
doi:10.1016/j.heliyon.2020.e04816. 322
40. Khalighi M, Eftekhari L, Hosseinpour S, Lahti L. Three-species Lotka-Volterra model 323  
with respect to Caputo and Caputo-Fabrizio fractional operators. *Symmetry.* 2021;13(3):368. 324  
doi:10.3390/sym13030368. 325
41. Sommer F, Anderson JM, Bharti R, Raes J, Rosenstiel P. The resilience of the intestinal microbiota 326  
influences health and disease. *Nat Rev Microbiol.* 2017;15(10):630–638. doi:10.1038/nrmicro.2017.58. 327
42. Khazaei T, Williams RL, Bogatyrev SR, Doyle JC, Henry CS, Ismagilov RF. Metabolic multistability 328  
and hysteresis in a model aerobe-anaerobe microbiome community. *Sci Adv.* 2020;6(33):eaba0353. 329  
doi:10.1126/sciadv.aba0353. 330

43. Bush T, Diao M, Allen RJ, Sinnige R, Muyzer G, Huisman J. Oxic-anoxic regime shifts mediated 331  
by feedbacks between biogeochemical processes and microbial community dynamics. *Nat Commun.* 332  
2017;8(1):1–9. doi:<https://doi.org/10.1038/s41467-017-00912-x>. 333
44. Goyal A, Dubinkina V, Maslov S. Multiple stable states in microbial communities explained by 334  
the stable marriage problem. *ISME J.* 2018;12(12):2823–2834. doi:10.1038/s41396-018-0222-x. 335
45. Hutchinson GE. The paradox of the plankton. *Am Nat.* 1961;95(882):137–145. doi:10.1086/282171. 336
46. Huston M. A general hypothesis of species diversity. *Am Nat.* 1979;113(1):81–101. 337  
doi:10.1086/283366. 338
47. Abreu CI, Andersen Woltz VL, Friedman J, Gore J. Microbial communities display 339  
alternative stable states in a fluctuating environment. *PLoS Comput Biol.* 2020;16(5):1–17. 340  
doi:10.1371/journal.pcbi.1007934. 341
48. Cairns J, Jokela R, Becks L, Mustonen V, Hiltunen T. Repeatable ecological dynamics govern 342  
the response of experimental communities to antibiotic pulse perturbation. *Nat Ecol Evol.* 343  
2020;4(10):1385–1394. doi:10.1038/s41559-020-1272-9. 344
49. Hiltunen T, Virta M, Laine AL. Antibiotic resistance in the wild: an eco-evolutionary perspective. 345  
*Philos Trans R Soc Lond, B, Biol Sci.* 2017;372(1712):20160039. doi:10.1098/rstb.2016.0039. 346
50. Sun H, Zhang Y, Baleanu D, Chen W, Chen Y. A new collection of real world applications of 347  
fractional calculus in science and engineering. *Commun Nonlinear Sci Numer Simul.* 2018;64:213–231. 348  
doi:10.1016/j.cnsns.2018.04.019. 349
51. Almeida R, Bastos NR, Monteiro MTT. Modeling some real phenomena by fractional differential 350  
equations. *Math Methods Appl Sci.* 2016;39(16):4846–4855. doi:10.1002/mma.3818. 351
52. Achar BNN, Hanneken JW, Clarke T. Response characteristics of a fractional oscillator. *Physica* 352  
*A.* 2002;309(3):275–288. doi:10.1016/S0378-4371(02)00609-X. 353
53. Tarasov VE. Quantum dissipation from power-law memory. *Ann Phys (N Y).* 2012;327(6):1719–1729. 354  
doi:10.1016/j.aop.2012.02.011. 355
54. Tofighi A. The intrinsic damping of the fractional oscillator. *Physica A.* 2003;329(1):29–34. 356  
doi:10.1016/S0378-4371(03)00598-3. 357
55. Arani BMS, Carpenter SR, Lahti L, van Nes EH, Scheffer M. Exit time as a measure of ecological 358  
resilience. *Science.* 2021;372(6547). doi:10.1126/science.aay4895. 359

56. Morozov A, Abbott K, Cuddington K, Francis T, Gellner G, Hastings A, et al. Long transients in ecology: Theory and applications. *Phys Life Rev.* 2020;32:1–40. doi:10.1016/j.plrev.2019.09.004.
57. Fukami T. Assembly history interacts with ecosystem size to influence species diversity. *Ecology.* 2004;85(12):3234–3242. doi:10.1890/04-0340.
58. Faust K, Lahti L, Gonze D, de Vos WM, Raes J. Metagenomics meets time series analysis: unraveling microbial community dynamics. *Curr Opin Microbiol.* 2015;25:56–66. doi:10.1016/j.mib.2015.04.004.
59. Armstrong McKay DI, Dyke JG, Doncaster CP, Dearing JA, Wang R. Network-based metrics of resilience and ecological memory in lake ecosystems. *bioRxiv.* 2020;doi:10.1101/810762.
60. Power DA, Watson RA, Szathmáry E, Mills R, Powers ST, Doncaster CP, et al. What can ecosystems learn? Expanding evolutionary ecology with learning theory. *Biology Direct.* 2015;10(1):69. doi:10.1186/s13062-015-0094-1.
61. Sun H, Chang A, Zhang Y, Chen W. A review on variable-order fractional differential equations: mathematical foundations, physical models, numerical methods and applications. *Fract Calc Appl Anal.* 2019;22(1):27–59. doi:10.1142/S0218127412300145.
62. Cooke KL, Grossman Z. Discrete delay, distributed delay and stability switches. *J Math Anal Appl.* 1982;86(2):592–627. doi:10.1016/0022-247X(82)90243-8.
63. Zúñiga-Aguilar C, Coronel-Escamilla A, Gómez-Aguilar J, Alvarado-Martínez V, Romero-Ugalde H. New numerical approximation for solving fractional delay differential equations of variable order using artificial neural networks. *Eur Phys J Plus.* 2018;133(2):1–16. doi:10.1140/epjp/i2018-11917-0.
64. Wang JL, Li HF. Memory-dependent derivative versus fractional derivative (I): Difference in temporal modeling. *J Comput Appl Math.* 2021;384:112923. doi:10.1016/j.cam.2020.112923.
65. Miller AD, Inamine H, Buckling A, Roxburgh SH, Shea K. How disturbance history alters invasion success: biotic legacies and regime change. *Ecol Lett.* 2021;24(4):687–697. doi:10.1111/ele.13685.
66. Yen P, Papin JA. History of antibiotic adaptation influences microbial evolutionary dynamics during subsequent treatment. *PLoS Biol.* 2017;15(8):1–34. doi:10.1371/journal.pbio.2001586.
67. Safdari H, Kamali MZ, Shirazi A, Khalighi M, Jafari G, Ausloos M. Fractional dynamics of network growth constrained by aging node interactions. *PLoS One.* 2016;11(5):e0154983. doi:10.1371/journal.pone.0154983.
68. Li C, Zhang F. A survey on the stability of fractional differential equations. *Eur Phys J Spec Top.* 2011;193(1):27–47. doi:10.1140/epjst/e2011-01379-1.

69. Emir K. Stability analysis of fractional differential equations with unknown parameters. *Nonlinear Anal Model Control.* 2019;24(2):224–240. doi:10.15388/NA.2019.2.5. 390  
391
70. Petráš I. Chaos in fractional-order population model. *Int J Bifurc Chaos Appl Sci Eng.* 2012;22(04):1250072. doi:10.1142/S0218127412500721. 392  
393
71. de Oliveira EC, Tenreiro Machado JA. A Review of Definitions for Fractional Derivatives and Integral. *Math Probl Eng.* 2014;2014. doi:10.1155/2014/238459. 394  
395
72. Caputo M. Linear models of dissipation whose Q is almost frequency independent–II. *Geophys J Int.* 1967;13(5):529–539. doi:10.1111/j.1365-246X.1967.tb02303.x. 396  
397
73. Kilbas AA, Srivastava HM, Trujillo JJ. *Theory and applications of fractional differential equations.* vol. 204. Elsevier; 2006. 398  
399
74. Podlubny I. *Fractional differential equations: An introduction to fractional derivatives, fractional differential equations, to methods of their solution and some of their applications.* Elsevier; 1998. 400  
401
75. Diethelm K, Ford NJ, Freed AD. A predictor-corrector approach for the numerical solution of fractional differential equations. *Nonlinear Dyn.* 2002;29(1-4):3–22. doi:10.1023/A:1016592219341. 402  
403
76. Garrappa R. On linear stability of predictor–corrector algorithms for fractional differential equations. *Int J Comput Math.* 2010;87(10):2281–2290. doi:10.1080/00207160802624331. 404  
405
77. Khalighi M. moeinkh88/Moein-Khalighi: article\_2021\_memoryeffects; 2021. Zenodo. Available from: <https://doi.org/10.5281/zenodo.4725218>. 406  
407
78. Diethelm K, Ford NJ, Freed AD. Detailed error analysis for a fractional Adams method. *Numer Algorithms.* 2004;36(1):31–52. doi:10.1023/B:NUMA.0000027736.85078.be. 408  
409

## Supporting information

410

### Appendix S1

411

In the following, we detail the mathematical aspects of incorporating ecological memory into a non-linear extension of the generalized Lotka-Volterra model.

412  
413

#### Memoryless model

414

We used as a starting point the following memoryless model, introduced by [18]:

415

$$\begin{aligned} \frac{dX_i}{dt} &= X_i (b_i f_i(\{X_k\}) - k_i X_i), \\ f_i(\{X_k\}) &= \prod_{\substack{k=1 \\ k \neq i}}^N \frac{K_{ik}^n}{K_{ik}^n + X_k^n}. \end{aligned} \quad (1)$$

This model describes the dynamics of each microbial species abundance  $X_i$  according to its growth rate  $b_i$ , its death rate  $k_i$  and an inhibition term  $f_i$ , which is defined by interaction constants  $K_{ij}$  and the Hill coefficient  $n$  as parameters.  $K_{ij}$  represents the inhibition of species  $i$  by species  $j$ : the lower it is, the stronger the inhibition.

416

417

418

419

The interaction matrix  $\mathbf{K} = \{K_{ij}\}$  was generated based on two alternative approaches. The first approach allocates the predefined species in three groups (see below and Fig 5 as in [18]), thereby setting different values of inter-group versus intra-group interactions. The second approach does not impose a predefined structure for the interaction matrix  $\mathbf{K}$  (Fig S4).

420

421

422

423

#### Three-group model

424

In the three-group approach, we define three sets of species indices by B (blue), R (red), and G (green). Each species  $i$  belongs to exactly one of these three groups. We define the growth rate of each group by the growth vector  $\mathbf{b} = [b_B, b_R, b_G]$ , where  $b_B = \{b_i \mid i \in B\}$ ,  $b_R = \{b_i \mid i \in R\}$ , and  $b_G = \{b_i \mid i \in G\}$ . We also define the interaction matrix  $\mathbf{K} = \{K_{ij} \mid i, j \in B \text{ or } R \text{ or } G\}$  such that  $K_{ij}$  only depends on the group memberships of species  $i$  and  $j$ , up to a slight noise (see Fig 5a and Appendix S2). We first considered a community of three species (*i.e.*, only one species per group), and then a community of 15 species forming three groups with strong inter-group inhibition and weak intra-group inhibition.

425

426

427

428

429

430

431

If the inhibition strength is large enough (small  $K_{ij}$ ), this model can have three coexisting stable states (tristability). This tristable community is dominated by either one of its three groups depending on initial species abundances, interaction matrix  $\mathbf{K}$ , and growth vector  $\mathbf{b}$ .

432

433

434

## Incorporating memory by fractional calculus

435

Fractional order derivatives have been successfully used to account for memory effects in many disciplines [32, 436  
33, 67]. This approach requires defining a temporal kernel in dynamical models [32, 33]. The stable regions 437  
of fractional differential equations differ from the corresponding classical one [35, 68, 69] and thus induce 438  
significant differences in the stability landscape of a community model. Interestingly, *chaos* has been 439  
observed in a fractional population model [70], which exhibits a structure entirely different from typical 440  
dynamical attractors such as the Rössler or Lorenz attractors. 441

To introduce memory in ODE models, we replace the ordinary time derivative in system (1) by the 442  
fractional derivative  $\mathfrak{D}^{\mu_i}$ . This leads to the appearance of a time correlation function (a memory kernel) 443  
which imposes a dependency between the current system state and its past trajectory. The past states of 444  
the system influence the current dynamics, giving rise to memory effects. 445

Let us now rewrite the initial model in (1) by employing fractional derivatives and the simplifying 446  
notation  $F_i = F(t, X_i) := X_i (b_i f_i(\{X_k\}) - k_i X_i)$ , as: 447

$$\mathfrak{D}^{\mu_i} X_i = F_i, \quad 0 < \mu_i \leq 1, \mu_i \in \mathbb{R}. \quad (2)$$

There are different definitions of fractional time derivatives for different purposes [71]. We use here the 448  
Caputo fractional time derivative [72],  $\mathfrak{D}^{\mu_i} := {}_t^c D_t^{\mu_i}$ , as a control parameter of memory effects because 449  
of its intuitive interpretation. This derivative is defined by the following integral equation for a given 450  
function  $g(t)$ : 451

$${}_t^c D_t^{\mu} g(t) = {}_t^c I_t^{1-\mu} g'(t) = \frac{1}{\Gamma(1-\mu)} \int_{t_0}^t \frac{g'(\tau) d\tau}{(t-\tau)^{\mu}}, \quad 0 < \mu \leq 1, \quad (3)$$

in which  ${}_t^c I_t^{1-\mu}$  is the fractional integral of order  $1-\mu$  that is defined by 452

$${}_t^c I_t^{\mu} g(t) = \frac{1}{\Gamma(\mu)} \int_{t_0}^t \frac{g(\tau) d\tau}{(t-\tau)^{1-\mu}}, \quad (4)$$

where  $\Gamma$  denotes the gamma function. Throughout this article, we quantify memory as  $1-\mu$ . 453

### Model interpretation

454

To provide an intuitive interpretation of the new system equation (2), let us apply a fractional Caputo 455  
derivative of order  $1-\mu_i$  on both sides of (2): 456

$${}_t^c D_t^{1-\mu_i} ({}_t^c D_t^{\mu_i} X_i) = {}_t^c D_t^{1-\mu_i} (F_i). \quad (5)$$

Because the Caputo fractional derivatives of order  $\mu$  and  $-\mu$  are inverse operators [73,74], this simplifies 457  
as: 458

$${}^c D_t^1 X_i = \frac{dX_i}{dt} = {}^c D_t^{1-\mu_i} (F_i). \quad (6)$$

Equation (6) shows that for  $\mu_i = 1$  we retrieve the standard integer derivative model (1) as a special 459  
case of the fractional derivative model (2), since the fractional operator becomes the unity operator for a 460  
fractional order of 1. Furthermore, the right-hand side of equation (6) can be expressed as the fractional 461  
integral of order  $(\mu_i - 1)$  on the interval  $[t_0, t]$ , that is: 462

$$\frac{dX_i(t)}{dt} = \frac{1}{\Gamma(\mu_i - 1)} \int_{t_0}^t (t - \tau)^{\mu_i - 2} F(\tau, X_i) d\tau. \quad (7)$$

The system described by equation (7) is a transformation of the original system (1) with an additional 463  
memory contributions  $\mu_i$ . When  $0 < \mu_i < 1$ , the time-dependent memory kernel  $\frac{1}{\Gamma(\mu_i - 1)}(t - \tau)^{\mu_i - 2}$  464  
guarantees the existence of temporal scaling behaviors which are common in nature. The memory kernel's 465  
decay rate depends on  $\mu_i$ : the lower the value of  $\mu_i$ , the slower it will decay. This shows how imposing 466  
memory on the system equation (1) slows down community dynamics. 467

The derivative order  $\mu_i$  can be used to control the strength of the memory so that when  $\mu_i$  goes 468  
toward the integer value 1, the influence of memory decreases, and the system tends toward a Markov 469  
process. In the context of microbial communities, memory may thus counteract the effects of species 470  
interactions. In the memoryless case ( $\mu_i = 1$ ), the kernel becomes a Dirac delta function,  $\delta(t - \tau)$ , which 471  
results in the integer-order integrodifferential equation of model (1). 472

In summary, the Caputo fractional derivative provide a means to incorporate ecological memory in a 473  
dynamical system based on a convolution integral with a power-law memory kernel. Besides, it could be 474  
modified by a time-delay reflecting the duration of memory effects and the kernel function shaping the 475  
memory weight [64]. 476

## Numerical simulations 477

Adams methods provide commonly used numerical solutions for ODEs, involving implicit (Adams-Moulton) 478  
and explicit (Adams-Bashforth) linear multi-step schemes. We exploited in this paper the predictor-corrector 479  
method based on Adams formulae (see [75,76]) and implemented it in MATLAB. The corresponding 480  
code is available on Zenodo [77]. 481

Given the system equation (2), let us write  $\mathbf{X}$  the set of all species abundances,  $\boldsymbol{\mu}$  the corresponding 482  
vector of derivative orders  $\mu_i$ , and  $\mathbf{F}$  the corresponding matrix function of all  $X_i$  ( $b_i f_i(\{X_k\}) - k_i X_i$ ). We 483  
can then rewrite the fractional order model (2) in the following matrix form: 484

$$\mathfrak{D}^{\boldsymbol{\mu}} \mathbf{X} = \mathbf{F}(t, \mathbf{X}), \text{ where } \mathbf{X}(t_0) = \mathbf{X}_0. \quad (8)$$



The initial value problem (8) is equivalent to the Volterra integral equation [73, 75]:

485

$$\mathbf{X}(t) = \mathbf{X}_0 + \frac{1}{\Gamma(\mu)} \int_{t_0}^t (t - \tau)^{\mu-1} \mathbf{F}(\tau, \mathbf{X}(\tau)) d\tau. \quad (9)$$

We solved Eq. (9) using a product integration technique, in which we replaced the function  $\mathbf{F}(\tau, \mathbf{X}(\tau))$  with piece-wise interpolating polynomials. For the grid nodes  $t_j$  ( $j = 0, \dots, m$ ) with constant step size  $h$  ( $t_j = t_0 + jh$ ), we write  $\mathbf{F}_j = \mathbf{F}(t_j, \mathbf{X}_j)$  where  $\mathbf{X}_j$  is the numerical approximation to  $\mathbf{X}(t_j)$ . The product rectangle rule [75] gives an explicit estimation of Eq. (9) as a predictor:

489

$$\mathbf{X}_m = \mathbf{X}_0 + h^\mu \sum_{j=0}^{m-1} \mathbf{b}_{m-j-1} \mathbf{F}_j, \quad (10)$$

$$\mathbf{b}_{m-j-1} = \frac{(m-j)^\mu - (m-j-1)^\mu}{\Gamma(\mu+1)},$$

and the product trapezoidal rule [75] provides an implicit estimation of Eq. (9) as a corrector:

490

$$\mathbf{X}_m = \mathbf{X}_0 + h^\mu \mathbf{c}_m \mathbf{F}_0 + h^\mu \sum_{j=1}^m \mathbf{d}_{m-j} \mathbf{F}_j,$$

$$\mathbf{c}_m = \frac{(m-1)^{\mu+1} - m^\mu (m-\mu-1)}{\Gamma(\mu+2)}, \quad (11)$$

$$\mathbf{d}_{m-j} = \begin{cases} \frac{1}{\Gamma(\mu+2)}, & \text{if } m-j = 0, \\ \frac{(m-j-1)^{\mu+1} - 2(m-j)^{\mu+1} + (m-j+1)^{\mu+1}}{\Gamma(\mu+2)}, & \text{if } m-j = 1, 2, \dots \end{cases}$$

The last term of the sum in the corrector equation (11),  $\mathbf{F}(t_m, \mathbf{X}_m)$ , is obtained by an approximation of  $\mathbf{X}_m$  in the predictor equation (10). This method is called FracPECE: Fractional Predict-Evaluate-Correct-Evaluate [75]. Because its standard implementation was not sufficient considering the stiffness of the equation, we improved its accuracy via an advanced convolution quadrature [76], and via multiple applications of the corrector step [78] when required. Specifically, we used several corrector iterations when the difference between two consecutive iterations was larger than the desired tolerance of  $10^{-6}$ . We considered a time step size of  $h = 0.01$  or  $0.005$  for all simulations.

Note that since the model with fractional order derivatives (2) includes the standard model (1) as a particular case (namely, for integer derivative order), the numerical approximations (10) and (11) are also solutions to equation (1). The explicit solution (10)–or an assessment of the implicit solution (11)–shows how memory influences the fundamental system dynamics through the dependence on  $\mu$ .

## Appendix S2

502

We provide in the Table below the detailed conditions and parameter values used in each of the numerical experiments presented in the main text. Additional methodological clarifications for figures 5c and S1 are given in the text below the table.

503  
504  
505

**Table . Exact model specifications for the 3-species and 15-species systems.**

| Figure                      | $X_0$                   |         |       | $K_{ij}$<br>$\forall i \neq j$ | $n$ | $k_i$<br>$\forall i$ | $\mu$                                                  |     |         | $b$                                      |      |                        |
|-----------------------------|-------------------------|---------|-------|--------------------------------|-----|----------------------|--------------------------------------------------------|-----|---------|------------------------------------------|------|------------------------|
|                             | B                       | R       | G     |                                |     |                      | B=R=G                                                  | B   | R       | G                                        |      |                        |
| <b>2a</b>                   |                         |         |       |                                |     |                      | 1 & 0.9                                                |     |         | Pulse1                                   |      | Pulse1                 |
| <b>2b</b>                   |                         |         |       |                                |     |                      | 1 & 0.9                                                |     |         | Pulse2                                   |      | Pulse2                 |
| <b>3a</b>                   | 0.99                    | 0.01    | 0.01  | 0.1                            | 2   | 1                    | 1 & 0.9 & 0.85                                         |     |         | Pulse3                                   | 0.95 | 1.05                   |
| <b>3b</b>                   |                         |         |       |                                |     |                      | 1 & 0.96 & 0.9                                         |     |         | Periodic                                 |      | 1.05                   |
| <b>4b-c</b>                 | 1/3                     | 1/3     | 1/3   | 0.1                            | 2   | 1                    | 1                                                      |     |         |                                          |      |                        |
|                             |                         |         |       |                                |     |                      | 0.9157959                                              |     |         |                                          |      |                        |
|                             |                         |         |       |                                |     |                      | 0.9157954                                              |     |         |                                          |      |                        |
|                             |                         |         |       |                                |     |                      | 0.9157952                                              |     |         |                                          |      | Stochastic             |
|                             |                         |         |       |                                |     |                      | 0.9                                                    |     |         |                                          |      |                        |
|                             |                         |         |       |                                |     |                      |                                                        |     |         |                                          |      |                        |
|                             |                         |         |       |                                |     |                      |                                                        |     |         |                                          |      |                        |
|                             |                         |         |       |                                |     |                      |                                                        |     |         |                                          |      |                        |
|                             |                         |         |       |                                |     |                      |                                                        |     |         |                                          |      |                        |
|                             |                         |         |       |                                |     |                      |                                                        |     |         |                                          |      |                        |
| <b>S1</b>                   | Equilibrium points      |         |       | Random interactions            | 4   | 2                    | No Specified Groups<br>$\mu_i, \forall i = 1$ (or 0.7) |     |         | $\mathcal{N}(1, 0.0025)$<br>with a pulse |      |                        |
| <b>S2a</b>                  | 0.99                    | 0.01    | 0.01  | 0.1                            | 2   | 1                    | 1                                                      | 1   | 1       |                                          |      |                        |
|                             |                         |         |       |                                |     |                      | 1                                                      | 1   | 0.90895 | Pulse4                                   | 0.95 | 1.05                   |
|                             |                         |         |       |                                |     |                      | 1                                                      | 1   | 0.90893 |                                          |      |                        |
| <b>S2b</b>                  | 1/3                     | 1/3     | 1/3   | 0.1                            | 2   | 1                    | 1                                                      | 1   | 1       |                                          |      |                        |
|                             |                         |         |       |                                |     |                      | 1                                                      | 1   | 0.8     | Stochastic                               |      |                        |
|                             |                         |         |       |                                |     |                      | 1                                                      | 0.9 | 1       |                                          |      |                        |
| <b>5</b>                    | <i>Uniform</i> (0, 0.1) |         |       | Predefined interactions        | 2   | 1                    | 1                                                      |     |         |                                          |      |                        |
|                             |                         |         |       |                                |     |                      | 0.6                                                    |     |         |                                          |      |                        |
|                             |                         |         |       |                                |     |                      | 0.851841                                               | 1   | 1       |                                          |      | $\mathcal{N}(1, 0.01)$ |
|                             |                         |         |       |                                |     |                      | 0.851840                                               |     |         |                                          |      |                        |
|                             |                         |         |       |                                |     |                      |                                                        |     |         |                                          |      |                        |
| <b>S3 &amp; 6a &amp; 6b</b> | [0.005, 0.05]           | 0.1&0.3 | 1&0.1 | 0.1                            | 2   | 1                    | 1                                                      | 1   | 1       |                                          |      |                        |
|                             |                         |         |       |                                |     |                      | 0.6                                                    | 0.6 | 1       | 4                                        | 0.95 | 1.05                   |
| <b>S4</b>                   | 0.25                    | 0.25    | 0.25  | 0.2                            | 2   | 0.5                  | 1                                                      | 1   | 1       |                                          |      |                        |
|                             |                         |         |       |                                |     |                      | 1                                                      | 0.4 | 0.7     |                                          |      | $\mathcal{N}(1, 0.01)$ |
|                             |                         |         |       |                                |     |                      | 0.5                                                    | 0.6 | 1       |                                          |      |                        |

Pulse1:  $b_B(t) = 0.5$  and  $b_G(t) = 2$  if  $20 \leq t < 60$ , otherwise  $b_B(t) = 1$  and  $b_G(t) = 1.05$ .

Pulse2:  $b_B(t) = 0.5$  and  $b_G(t) = 2.2$  if  $20 \leq t < 60$ , otherwise  $b_B(t) = 1$  and  $b_G(t) = 1.05$ .

Pulse3:  $b_B(t) = 0.2$  if  $60 \leq t < 100$ ,  $b_B(t) = 4.5$  if  $200 \leq t < 330$ , otherwise  $b_B(t) = 1$ .

Periodic:  $b_B(t) = 1$  if  $20(2m - 2) \leq t < 20(2m - 1)$ ,  $b_B(t) = 0.2$  if  $20(4m - 3) \leq t < 20(4m - 2)$ ,  $b_B(t) = 4.5$  if  $20(4m - 1) \leq t < 20(4m)$  where  $m \in \mathbb{N}$ .

Stochastic: The growth rates of these panels are generated by mean-reverting the Ornstein-Uhlenbeck Process described by the stochastic equation  $db_t = \theta(\phi - b_t)dt + \sigma dW_t$ .

Random interactions:  $K_{ij} = 1 - e^{-5z}$ , where  $z$  is randomly generated from a uniform distribution between 0 and 1.

Predefined interactions:  $K_{ij} \sim 1 + \mathcal{N}(0, 0.01)$  for species  $i$  and  $j$  in the same group (intra-group interactions  $K_{BB}$ ,  $K_{RR}$ ,  $K_{GG}$ ), and  $K_{ij} \sim 0.5 + \mathcal{N}(0, 0.01)$  for species  $i$  and  $j$  in different groups (inter-group interactions).

Pulse4:  $b_B(t) = 0.2$  if  $60 \leq t < 100$ ,  $b_B(t) = 4.5$  if  $400 \leq t < 530$ , otherwise  $b_B(t) = 1$ .

**Fig 5c.** Ternary plots allow representing the state of a 3-species or 3-group system by a single dot and therefore are a convenient way to display the outcome of many simulations at a time. In Fig 5c, each ternary plot shows the stable state distribution of the group relative abundances obtained for 50 different simulations, each represented by a dot of the color of the dominant group. We detail below how we computed the position of each dot in the triangle. Let us write  $B$ ,  $G$  and  $R$  the average stable state

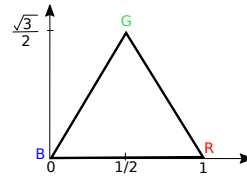

**Fig .** Triangle coordinates.

relative abundances of the species in the blue, green and red groups, that is  $R = \frac{\sum_{i=1}^5 R_i(end)}{\sum_i (R_i + B_i + G_i)(end)}$  (and similarly for  $B$  and  $G$ ), where  $Z_i(end)$  denotes the abundance of species  $i$  in group  $Z$  at the end of the simulation. Let us consider an equilateral triangle in which each vertex corresponds to the complete dominance of one group of species, as shown in the Figure above. Thus, a point (dot) close to the middle of the triangle indicates a state of the system characterized by relatively even species abundances. If  $B = 1$  (100%) is placed at  $(x, y) = (0, 0)$  and  $R = 1$  (100%) at  $(1, 0)$ , then  $G = 1$  (100%) is at  $(\frac{1}{2}, \frac{\sqrt{3}}{2})$ , and any triplet  $(B, R, G)$  will be at  $[\frac{1}{2}(2R + G), \frac{\sqrt{3}}{2}G]$ . These Cartesian coordinates provide a way to map any triplet of group relative abundances to a unique location on the triangle.

**Fig S1.** Here, we randomly generated an interaction matrix  $\mathbf{K}$  without predefined structure between  $N = 15$  species. Specifically, we set  $n = 4$  and  $K_{ij} = 1 - e^{-5z}$ , where  $z$  is a randomly generated number from a uniform distribution between 0 and 1. We generated 10 communities, each with a random vector of growth rates generated as  $b_i \sim \mathcal{N}(1, 0.0025)$ ,  $\forall i$ . We used the same interaction matrix for all 10 communities, and death rates  $k_i = 2$ ,  $\forall i$ . For each community, we set the initial values for species abundances  $X_i$  at one of the equilibrium points of the system (randomly chosen). To compute the dissimilarity of the community between times  $t_r$  and  $t_p$ , we used the Bray-Curtis distance, computed as

$$BC(t_r, t_p) = \frac{\sum_{i=1}^N |X_i(t_r) - X_i(t_p)|}{\sum_{i=1}^N X_i(t_r) + X_i(t_p)}.$$

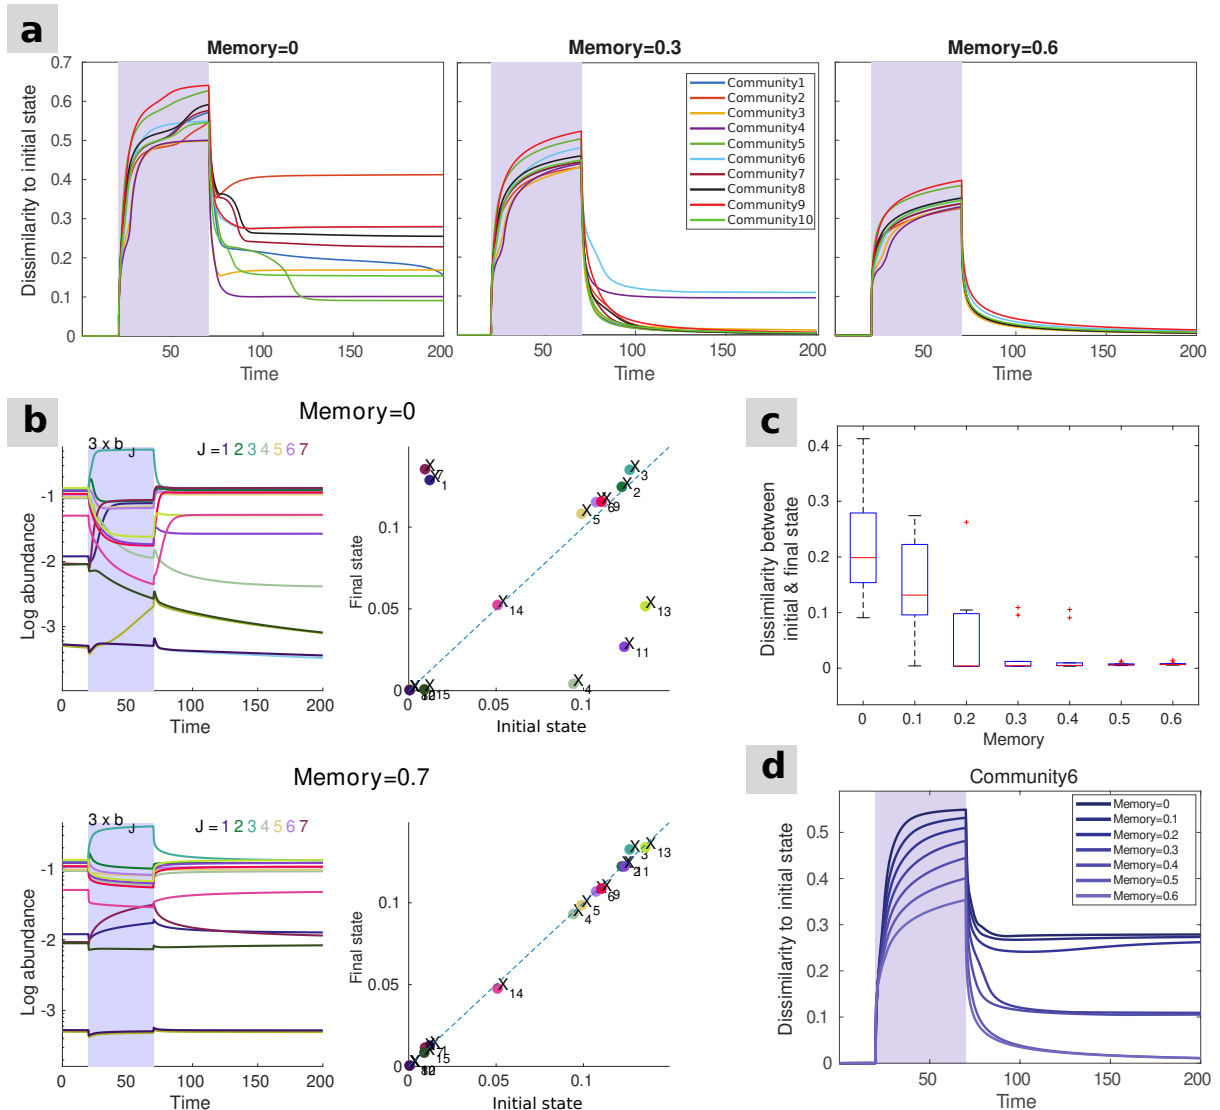

**Fig S1. Memory effects preserve the stable state.** We simulated ten communities of 15 species, each with random interaction matrices. A similar level of commensurate memory is applied to all ten communities. Every community is initially in a stable state of the system, and a perturbation is imposed by multiplying the growth rates of half of the species ( $b_1, \dots, b_7$ ) by 3. The simulation is stopped when the system is close to its new stable state. Although only the effect of commensurate memory is illustrated here, the same outcome can be achieved using incommensurate memory. **(a)** Dissimilarity to the initial stable state through time for all ten communities, for three different memory strengths. The stronger the memory, the more constrained the community trajectories are, and the more likely they are to revert to their initial stable state eventually. **(b)** Time series for one randomly chosen community, community 6. The pulse perturbations lead the community to an alternative stable state in the absence of memory (top), while adding memory effects allows recovering the original state (bottom). **(c)** Community dissimilarity (Bray-Curtis) between the start and the end of the simulation for all ten communities and different memory levels. Without memory, the pulse perturbation changes the abundances of some of the species and leads to an alternative stable state (*i.e.*, non-zero dissimilarity between start and end). In contrast, all communities recover their pre-perturbation stable state in the presence of memory (*i.e.*, zero dissimilarity). **(d)** Dissimilarity to the initial stable state through time in community 6, for different memory strengths.

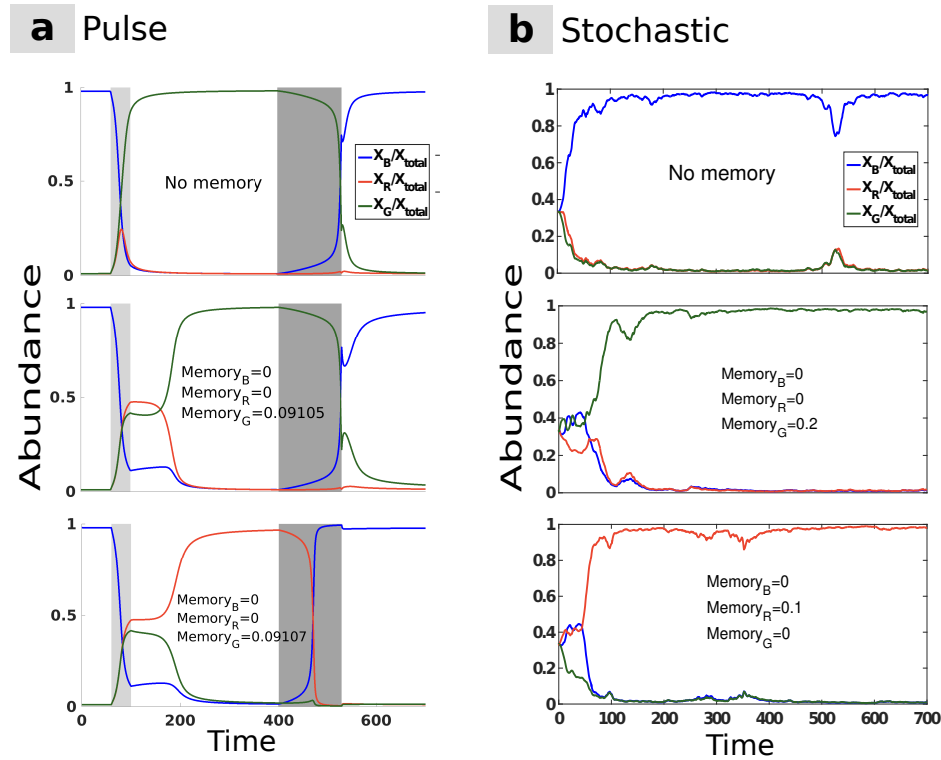

**Fig S2. Role of memory in an incommensurate system.** (a) The order derivative of  $X_G$  is a non-integer value,  $0 < \mu_G < 1$ , and the derivative order of  $X_B$  and  $X_R$  are integer,  $\mu_B = \mu_R = 1$ . Around a particular value of the order derivative of the green species ( $\mu_G = 0.90895$ ), the system behaves differently after the first perturbation: for  $\mu_G$  in the interval  $]0.90895, 1]$ , the green species will be dominant, while in the interval  $]0, 0.90894]$  the red species will be dominant. (b) The growth rates follow the same Ornstein-Uhlenbeck process as in Fig 4. For the system without memory, the blue species is dominant. However, when imposing sufficient memory on the green or red species, they become dominant in the stable state.

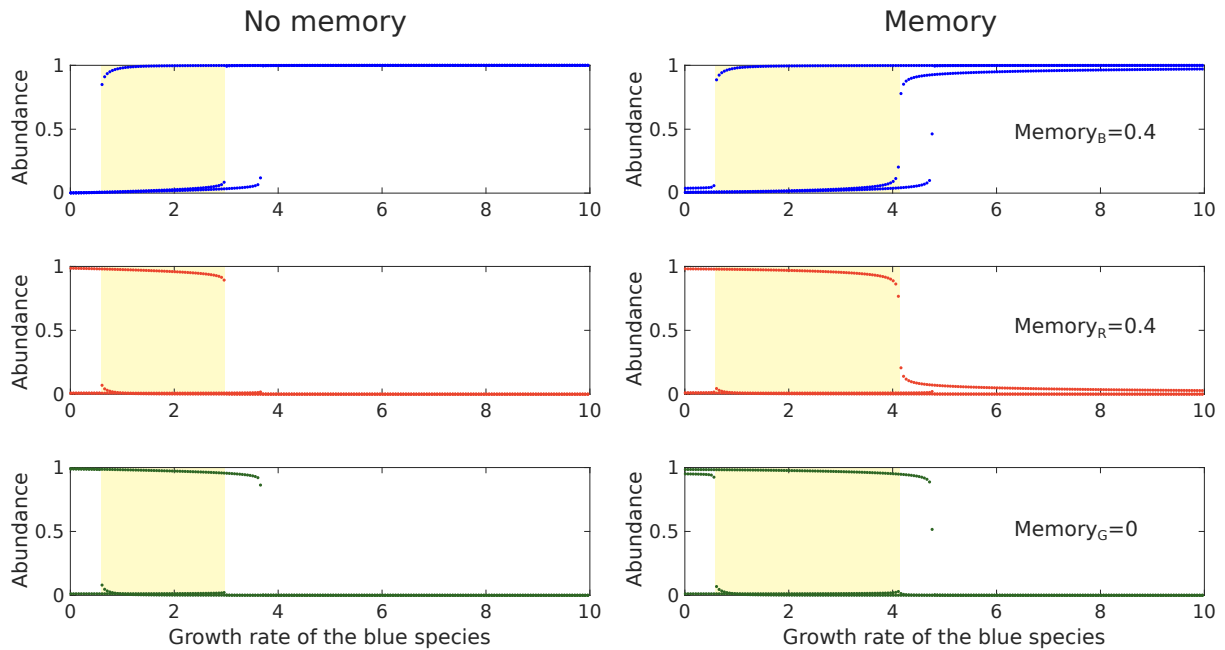

**Fig S3. Memory broadens the model's multistable region.** Bifurcation diagrams for the system shown in Fig 6, showing the relative abundance of the blue, red, and green species (from top to bottom) as a function of the blue species' growth rate for three different initial conditions (leading to three distinct curves per plot), in the absence (left) or presence (right) of memory. The yellow area shows the region of the parameter space that exhibits multistability, which is extended by the introduction of incommensurate memory (right).

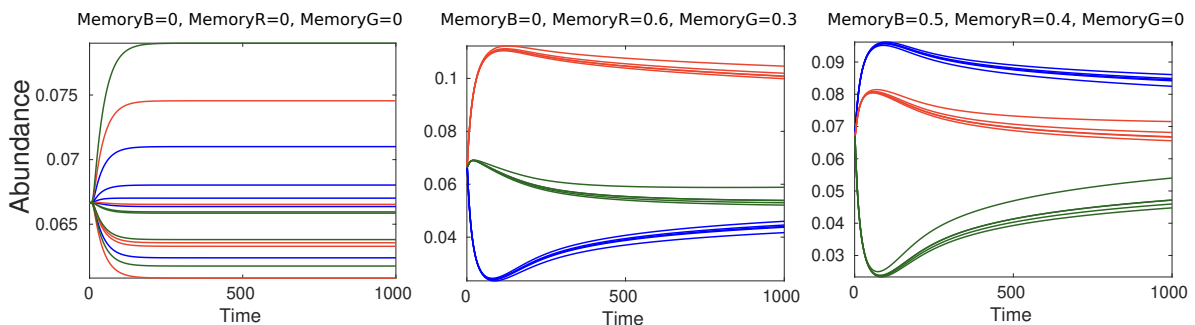

**Fig S4. Groups of species can emerge from incommensurate memory.** We consider here a 15-species community with equal interactions between species and identical initial abundances for all species, where species growth rates are drawn from  $\mathcal{N}(1, 0.01)$ . As expected, the species do not form groups in the absence of memory (left panel). When the species are randomly split into three groups (red, green, blue) with varying degrees of memory, species with a similar degree of memory tend to exhibit similar dynamics and group together due to their shared memory properties (middle panel). A switch to an alternative stable state can be triggered by changing the strength of memory effects (right panel).
